# Supplementary material
Source: PubMed Central journal article supplement (PMC11028378)
Supplement: 262_2017_2098_MOESM1_ESM.pdf [file 262_2017_2098_MOESM1_ESM.pdf]

**Supplementary Table 1: Association between PD-L1 expression and patient characteristics (except EGFR mutation status) in the TMA cohort**

| PD-L1 Expression             | IC and TC <1% | IC or TC >=1% | Total | P-value |
|------------------------------|---------------|---------------|-------|---------|
| <b>Gender</b>                |               |               |       |         |
| n                            | 63(58.3%)     | 45(41.7%)     | 108   | 1.000   |
| female                       | 17(58.6%)     | 12(41.4%)     | 29    |         |
| male                         | 46(58.2%)     | 33(41.8%)     | 79    |         |
| <b>Tumor Histology</b>       |               |               |       |         |
| n                            | 63(58.3%)     | 45(41.7%)     | 108   | 0.685   |
| Non-squamous                 | 42(60%)       | 28(40%)       | 70    |         |
| Squamous                     | 21(55.3%)     | 17(44.7%)     | 38    |         |
| <b>Smoking Status</b>        |               |               |       |         |
| n                            | 59(59%)       | 41(41%)       | 100   | 0.288   |
| Current                      | 22(55%)       | 18(45%)       | 40    |         |
| Never                        | 24(55.8%)     | 19(44.2%)     | 43    |         |
| Previous                     | 13(76.5%)     | 4(23.5%)      | 17    |         |
| <b>Tumor Stage</b>           |               |               |       |         |
| n                            | 63(58.3%)     | 45(41.7%)     | 108   | 0.397   |
| 1,2,3a                       | 58(56.9%)     | 44(43.1%)     | 102   |         |
| 3b,4                         | 5(83.3%)      | 1(16.7%)      | 6     |         |
| <b>Treatment Type</b>        |               |               |       |         |
| n                            | 63(58.3%)     | 45(41.7%)     | 108   | 1.000   |
| Surgery only                 | 28(58.3%)     | 20(41.7%)     | 48    |         |
| Surgery + others             | 35(58.3%)     | 25(41.7%)     | 60    |         |
| <b>Differentiation Level</b> |               |               |       |         |
| n                            | 56(60.2%)     | 37(39.8%)     | 93    | 0.257   |
| Moderately differentiated    | 36(64.3%)     | 20(35.7%)     | 56    |         |
| Poorly differentiated        | 14(48.3%)     | 15(51.7%)     | 29    |         |
| Well differentiated          | 6(75%)        | 2(25%)        | 8     |         |

**Supplementary Table 2: Association between PD-L1 expression and patient characteristics (except EGFR mutation status) in the whole-section cohort**

| PD-L1 Expression             | IC and TC <1% | IC or TC >=1% | Total | P-value |
|------------------------------|---------------|---------------|-------|---------|
| <b>Gender</b>                |               |               |       |         |
| n                            | 63(60%)       | 42(40%)       | 105   | 0.001   |
| female                       | 33(80.5%)     | 8(19.5%)      | 41    |         |
| male                         | 30(46.9%)     | 34(53.1%)     | 64    |         |
| <b>Tumor Histology</b>       |               |               |       |         |
| n                            | 63(60%)       | 42(40%)       | 105   | 0.042   |
| Non-squamous                 | 51(66.2%)     | 26(33.8%)     | 77    |         |
| Squamous                     | 12(42.9%)     | 16(57.1%)     | 28    |         |
| <b>Smoking Status</b>        |               |               |       |         |
| n                            | 62(59.6%)     | 42(40.4%)     | 104   | 0.057   |
| Current                      | 16(45.7%)     | 19(54.3%)     | 35    |         |
| Never                        | 45(66.2%)     | 23(33.8%)     | 68    |         |
| Previous                     | 1(100%)       | 0(0%)         | 1     |         |
| <b>Tumor Stage</b>           |               |               |       |         |
| n                            | 63(60%)       | 42(40%)       | 105   | 0.751   |
| 1,2,3a                       | 57(60.6%)     | 37(39.4%)     | 94    |         |
| 3b,4                         | 6(54.5%)      | 5(45.5%)      | 11    |         |
| <b>Treatment Type</b>        |               |               |       |         |
| n                            | 63(60%)       | 42(40%)       | 105   | 1       |
| Surgery only                 | 42(60%)       | 28(40%)       | 70    |         |
| Surgery + others             | 21(60%)       | 14(40%)       | 35    |         |
| <b>Differentiation Level</b> |               |               |       |         |
| n                            | 59(60.2%)     | 39(39.8%)     | 98    | <0.001  |
| Moderately differentiated    | 47(82.5%)     | 10(17.5%)     | 57    |         |
| Poorly differentiated        | 11(28.2%)     | 28(71.8%)     | 39    |         |
| Well differentiated          | 1(50%)        | 1(50%)        | 2     |         |

**Supplementary Table 3: Previous reports on the association between PD-L1 expression and various clinical characteristics**

| Clinical Characteristics                 | Reports                                                                                                                                                                                                                                                                                                                                                                                                                                                                                     |
|------------------------------------------|---------------------------------------------------------------------------------------------------------------------------------------------------------------------------------------------------------------------------------------------------------------------------------------------------------------------------------------------------------------------------------------------------------------------------------------------------------------------------------------------|
| <b>Age</b>                               |                                                                                                                                                                                                                                                                                                                                                                                                                                                                                             |
| Younger higher*                          | Cooper et al.[40]                                                                                                                                                                                                                                                                                                                                                                                                                                                                           |
| Older higher                             | Sun et al.[36]                                                                                                                                                                                                                                                                                                                                                                                                                                                                              |
| <b>Gender</b>                            |                                                                                                                                                                                                                                                                                                                                                                                                                                                                                             |
| Female higher                            | Azuma et al.[41]                                                                                                                                                                                                                                                                                                                                                                                                                                                                            |
| Male higher                              | Takada et al.[50], Sun et al.[36]                                                                                                                                                                                                                                                                                                                                                                                                                                                           |
| <b>Tumor Histology</b>                   |                                                                                                                                                                                                                                                                                                                                                                                                                                                                                             |
| Non-squamous higher                      | D’Incecco et al.[39], Azuma et al.[41]                                                                                                                                                                                                                                                                                                                                                                                                                                                      |
| Squamous higher                          | Cooper et al.[40], Sun et al.[36]                                                                                                                                                                                                                                                                                                                                                                                                                                                           |
| <b>Smoking Status</b>                    |                                                                                                                                                                                                                                                                                                                                                                                                                                                                                             |
| Smoker higher                            | D’Incecco et al.[39], Huynh et al.[45], Takada et al.[50], Sun et al.[36]                                                                                                                                                                                                                                                                                                                                                                                                                   |
| Non-smoker higher                        | Azuma et al.[41]                                                                                                                                                                                                                                                                                                                                                                                                                                                                            |
| <b>Tumor Stage</b>                       |                                                                                                                                                                                                                                                                                                                                                                                                                                                                                             |
| 1 or 2 higher                            |                                                                                                                                                                                                                                                                                                                                                                                                                                                                                             |
| 3 or 4 higher                            | Sun et al.[36], Takada et al.[50], Zhang et al.[51]                                                                                                                                                                                                                                                                                                                                                                                                                                         |
| <b>Differentiation Level</b>             |                                                                                                                                                                                                                                                                                                                                                                                                                                                                                             |
| Poorly differentiated higher             | Wang et al.[38], Pan et al.[37], Inamura et al.[46]                                                                                                                                                                                                                                                                                                                                                                                                                                         |
| Moderately or well differentiated higher |                                                                                                                                                                                                                                                                                                                                                                                                                                                                                             |
| <b>EGFR</b>                              |                                                                                                                                                                                                                                                                                                                                                                                                                                                                                             |
| Mutant higher                            | Lin et al.[42], Tang et al.[44], D’Incecco et al.[39], Azuma et al.[41], Song et al.[43]                                                                                                                                                                                                                                                                                                                                                                                                    |
| Wild-type higher                         | Huynh et al.[45], Inamura et al.[46], Takada et al.[50], Ji et al.[47]                                                                                                                                                                                                                                                                                                                                                                                                                      |
| <b>Prognosis</b>                         |                                                                                                                                                                                                                                                                                                                                                                                                                                                                                             |
| Favorable                                | Cooper et al.[40] (in early-stage patients), Tang et al.[44] (in EGFR mutant patients), D’Incecco et al.[39] (in EGFR mutant patients), Schmidt et al.[58] (in patients with squamous cell carcinoma, adjuvant therapy, increased tumor size and positive lymph node status), Ameratunga et al.[54] (for N2 patients), Yang et al.[60] (in patients with stage I squamous cell carcinoma), Toyokawa et al.[59], Miao et al.[57], Lin et al. (in EGFR mutant patients)[56], Ishii et al.[55] |
| Unfavorable                              | Tang et al.[44] (in EGFR wild-type patients), Azuma et al.[41], Wang et al.[38], Sun et al.[36], Pan et al.[37], Huynh et al.[45], Koh et al.[48], Inamura et al.[46], Takada et al.[50], Ji et al.[47], Meniawy et al.[49], Zhou et al.[52], Zhang et al.[51]                                                                                                                                                                                                                              |

\*: “Younger higher” means “The previous study reported that younger patients showed higher PD-L1 expression”. Similar meaning applies to the description on the association between the other clinical characteristics and PD-L1 expression in this table.

**Supplementary Table 4: The effect of PD-L1 level on OS in different patient sub-groups of the PTEN-qualified TMA samples divided according to various clinical parameters**

| Risk factor                  | Total n | PD-L1 Low |        | PD-L1 High |        | Hazard Ratio | (95% CI)       | PD-L1 High better | PD-L1 Low better |
|------------------------------|---------|-----------|--------|------------|--------|--------------|----------------|-------------------|------------------|
|                              |         | n         | Events | n          | Events |              |                |                   |                  |
| All samples                  | 108     | 63        | 36     | 45         | 18     | 0.58         | (0.33 - 1.02)  |                   |                  |
| <b>Tumor Histology</b>       |         |           |        |            |        |              |                |                   |                  |
| Non-squamous                 | 70      | 42        | 26     | 28         | 11     | 0.53         | (0.26 - 1.07)  |                   |                  |
| Squamous                     | 38      | 21        | 10     | 17         | 7      | 0.68         | (0.26 - 1.80)  |                   |                  |
| <b>Treatment Type</b>        |         |           |        |            |        |              |                |                   |                  |
| other(neo/adj chemo)         | 60      | 35        | 20     | 25         | 8      | 0.47         | (0.21 - 1.06)  |                   |                  |
| surgery only                 | 48      | 28        | 16     | 20         | 10     | 0.73         | (0.33 - 1.60)  |                   |                  |
| <b>EGFR status</b>           |         |           |        |            |        |              |                |                   |                  |
| Mutation                     | 16      | 13        | 7      | 3          | 1      | 0.37         | (0.04 - 3.13)  |                   |                  |
| Unknown                      | 42      | 22        | 10     | 20         | 5      | 0.48         | (0.16 - 1.39)  |                   |                  |
| Wildtype                     | 50      | 28        | 19     | 22         | 12     | 0.62         | (0.30 - 1.28)  |                   |                  |
| <b>Sex</b>                   |         |           |        |            |        |              |                |                   |                  |
| female                       | 29      | 17        | 10     | 12         | 5      | 0.64         | (0.22 - 1.90)  |                   |                  |
| male                         | 79      | 46        | 26     | 33         | 13     | 0.57         | (0.29 - 1.10)  |                   |                  |
| <b>Smoking Status</b>        |         |           |        |            |        |              |                |                   |                  |
| Current                      | 40      | 22        | 16     | 18         | 8      | 0.39         | (0.17 - 0.92)  |                   |                  |
| Never                        | 43      | 24        | 11     | 19         | 7      | 0.78         | (0.30 - 2.01)  |                   |                  |
| Previous                     | 17      | 13        | 6      | 4          | 2      | 0.84         | (0.17 - 4.14)  |                   |                  |
| <b>Tumor Stage</b>           |         |           |        |            |        |              |                |                   |                  |
| 1,2,3a                       | 102     | 58        | 31     | 44         | 17     | 0.61         | (0.34 - 1.10)  |                   |                  |
| 3b,4                         | 6       | 5         | 5      | 1          | 1      | 1.93         | (0.17 - 21.69) |                   |                  |
| <b>Differentiation Level</b> |         |           |        |            |        |              |                |                   |                  |
| Moderately differentiated    | 56      | 36        | 18     | 20         | 8      | 0.73         | (0.32 - 1.69)  |                   |                  |
| Poorly differentiated        | 29      | 14        | 10     | 15         | 7      | 0.41         | (0.16 - 1.10)  |                   |                  |
| Well differentiated          | 8       | 6         | 3      | 2          | 1      | 0.63         | (0.06 - 6.31)  |                   |                  |
